# Supplementary material for: Facile electrochemical synthesis of 3D nano-architectured CuO electrodes for high-performance supercapacitors
Source: Royal Society of Chemistry journal article supplement (doi:10.1039/c4ta02444c), 2014-01-01
Supplement: c4ta02444c1.pdf [file c4ta02444c1.pdf]

## **Facile electrochemical synthesis of 3D nano-architected CuO**

### **electrodes for high-performance supercapacitors**

Ming-Jay Deng<sup>a†\*</sup>, Cheng-Chia Wang<sup>a,b†</sup>, Pei-Jung Ho<sup>a,c</sup>, Chih-Ming Lin<sup>c</sup>, Jin-Ming

Chen<sup>a\*</sup>, Kueih-Tzu Lu<sup>a\*</sup>

*a National Synchrotron Radiation Research Center, Hsinchu, Taiwan.*

*b Department of Materials Science and Engineering, National Chiao Tung University,*

*Hsinchu, Taiwan*

*c Department of Applied Science, National Hsinchu University of Education, Hsinchu,*

*Taiwan*

E-mail: [deng.mj@nsrrc.org.tw](mailto:deng.mj@nsrrc.org.tw) or [martinez730523@yahoo.com.tw](mailto:martinez730523@yahoo.com.tw) ;

[jmchen@nsrrc.org.tw](mailto:jmchen@nsrrc.org.tw); [ktlu@nsrrc.org.tw](mailto:ktlu@nsrrc.org.tw)

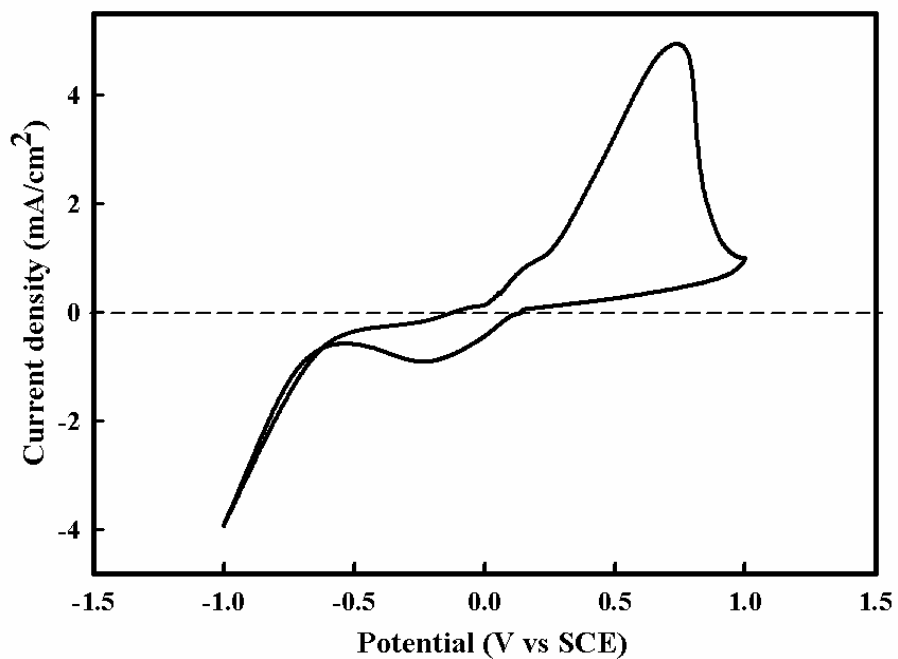

**Figure S1** Cyclic voltammogram of the Ni foam electrode in solution ( $\text{NiSO}_4$  0.5 M ,  $\text{NiCl}_2$  0.5 M ,  $\text{CuSO}_4$  0.01 M,  $\text{H}_3\text{BO}_3$  1 M) at potential scan rate  $10 \text{ mV s}^{-1}$ .

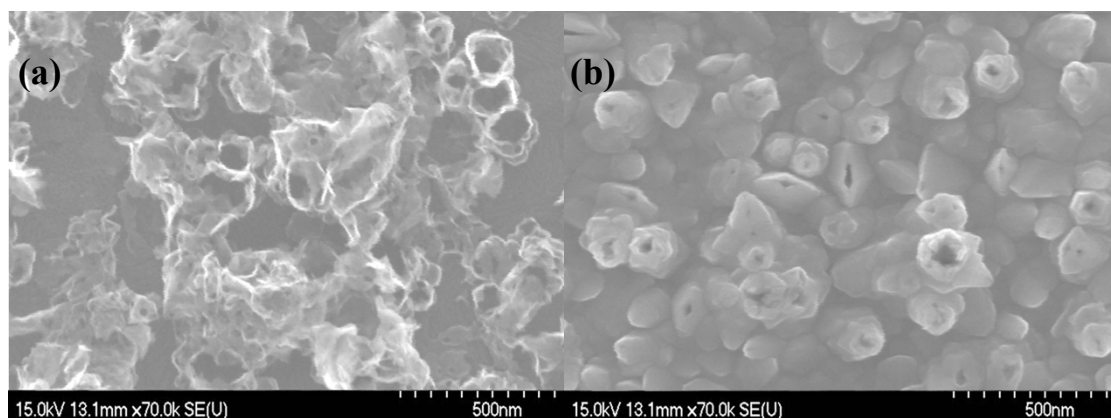

**Figure S2** SEM micrographs of Ni-Cu alloy films that were electrodeposited at (a) - 0.70V and (b) -0.85V followed by selective dissolution at 0.80 V.

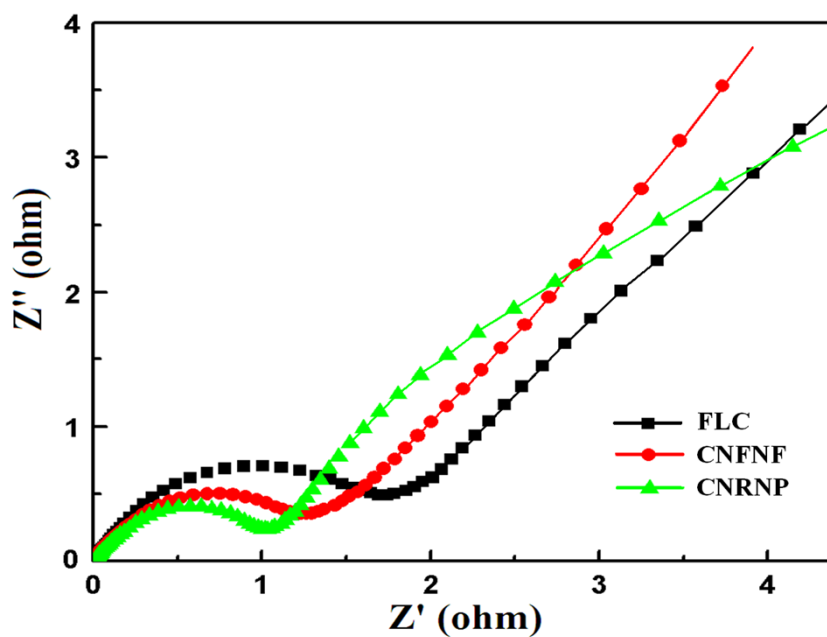

**Figure S3** Nyquist plots of three electrodes for supercapacitors.

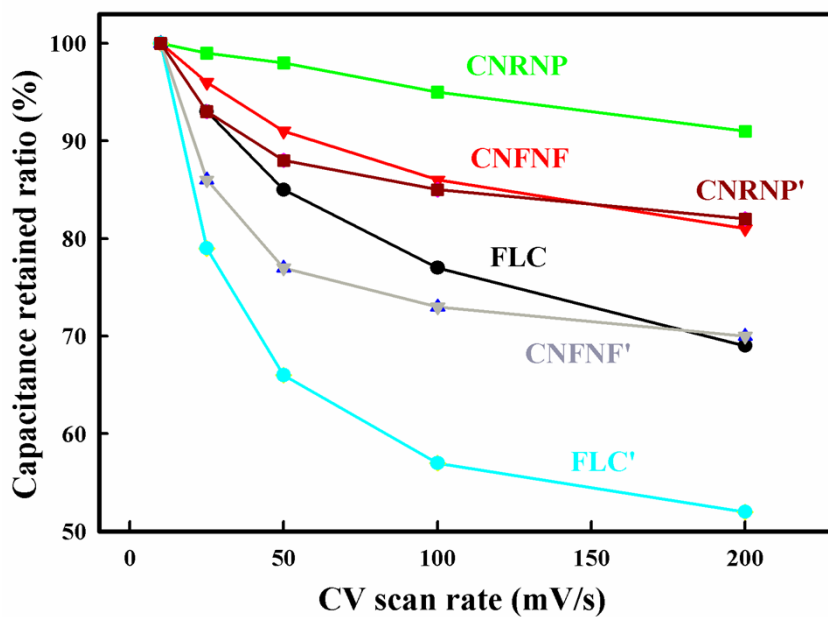

**Figure S4** Capacitance-retention ratios as a function of the CV scan rate for CNRNP, CNFNF, FLC, CNRNP', CNFNF' and FLC' electrodes. The amounts of deposited CuO were  $0.32 \text{ mg cm}^{-2}$  (curves CNRNP, CNFNF, FLC) and  $1.2 \text{ mg cm}^{-2}$  (curves CNRNP', CNFNF', FLC').

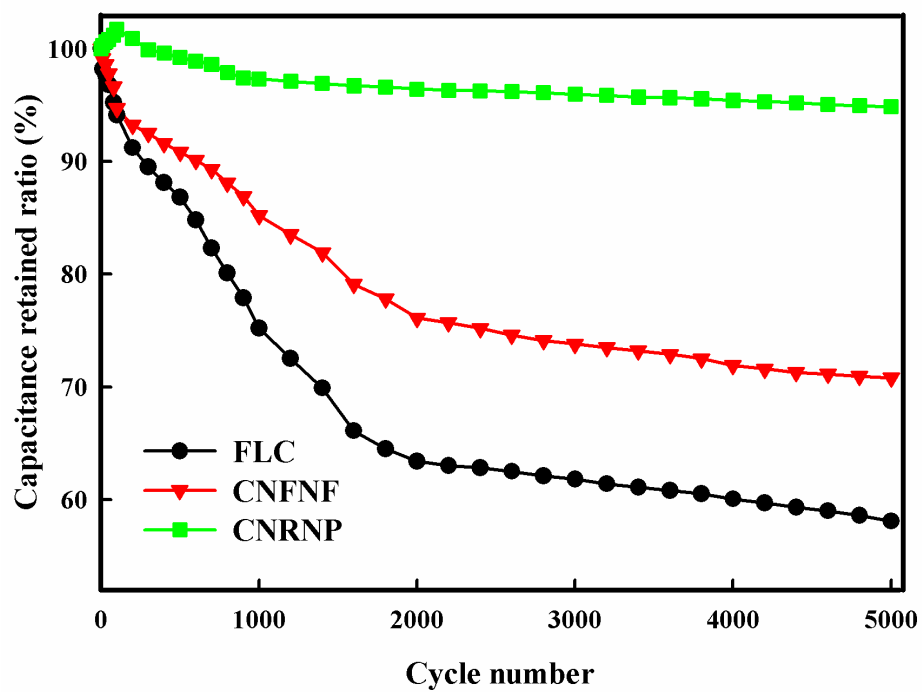

**Figure S5** Cycle performance of the CNRNP, CNFNF and FLC electrodes.
